# Supplementary material for: RNAi screens for Rho GTPase regulators of cell shape and YAP/TAZ localisation in triple negative breast cancer
Source: PubMed Central journal article supplement (PMC5332010; doi:10.1038/sdata.2017.18), 2017-03-01
Supplement: sdata201718-s2.pdf [file sdata201718-s2.pdf]

**a** *DOCK5* mRNA expression levels

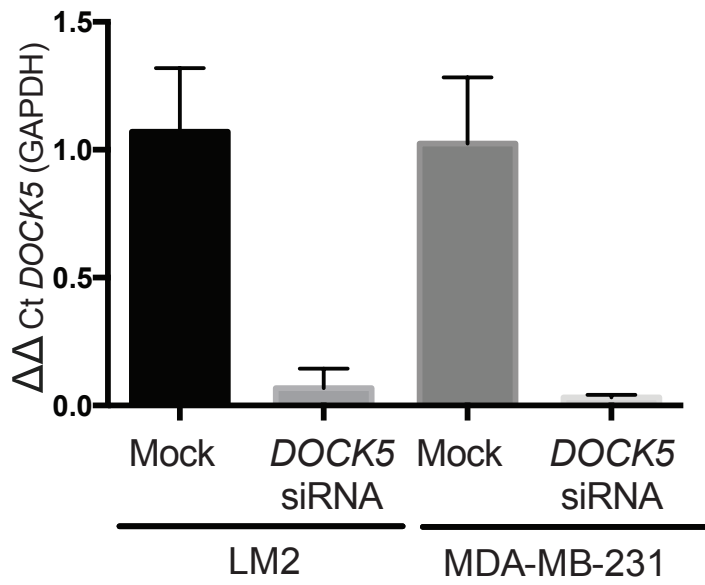

**b** *ECT2* mRNA expression levels

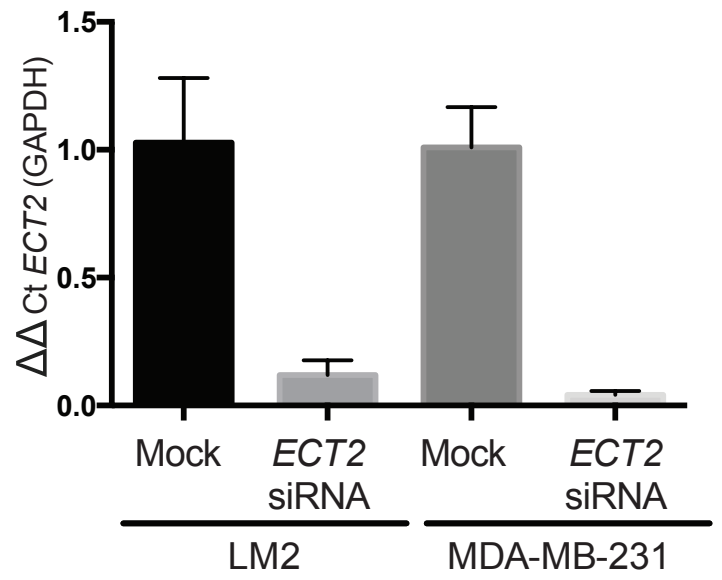

**c** *ARHGEF7* mRNA expression levels

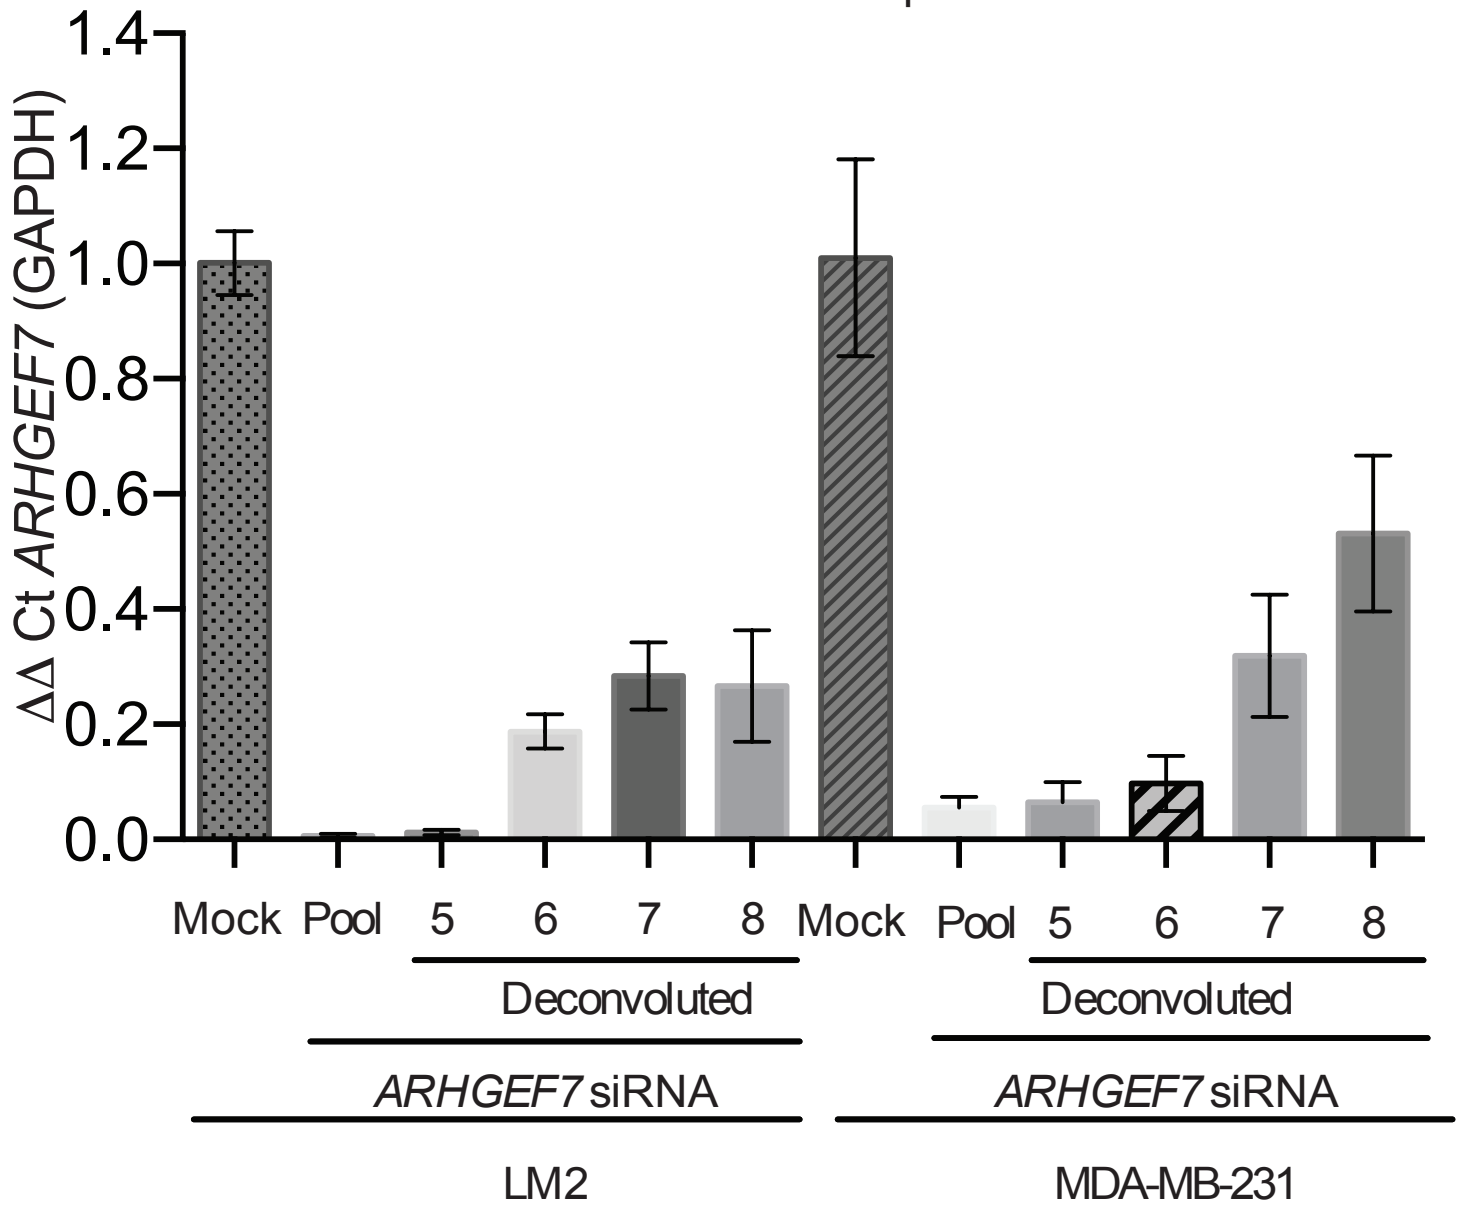

Supplementary Figure 1: siRNA validation. (a) *DOCK5* mRNA expression levels normalised to *GAPDH* for mock-transfected and *DOCK5* siRNA containing LM2 and MDA-MB-231s. (b) *ECT2* mRNA expression levels normalised to *GAPDH* for mock-transfected and *ECT2* siRNA containing LM2 and MDA-MB-231s. (c) *ARHGEF7* mRNA expression levels normalised to *GAPDH* for LM2 and MDA-MB-231s that were mock-transfected, contained *ARHGEF7* siRNA, and individual siRNAs targeting *ARHGEF7*. Data are shown as means  $\pm$  standard deviation from at least 3 technical replicates.
